# Supplementary material
Source: PubMed Central journal article supplement (PMC2877947)
Supplement: JCI41384sd.pdf [file JCI41384sd.pdf]

**Statins reduce T cell inflammatory and pathogenic responses by inducing Kruppel-like factor 2 expression**

De-xiu Bu<sup>1</sup>, Margarite Tarrío<sup>1</sup>, Nir Grabie<sup>1</sup>, Yuzhi Zhang<sup>1</sup>, Hiroyuki Yamazaki<sup>2</sup>, George Stavrakis<sup>1</sup>, Elena Maganto-Garcia<sup>1</sup>, Zachary Pepper-Cunningham<sup>1</sup>, Petr Jarolim<sup>1</sup>, Masanori Aikawa<sup>2</sup>, Guillermo García-Cardeña<sup>1</sup>, Andrew H Lichtman<sup>1</sup>.

<sup>1</sup>Department of Pathology, Brigham and Women's Hospital, Boston, Massachusetts, USA.

<sup>2</sup> Cardiovascular Division, Department of Medicine, Brigham and Women's Hospital, Boston, Massachusetts, USA.

Address correspondences to: Andrew H. Lichtman, Brigham and Women's Hospital, NRB Room 752N, 77 Avenue Louis Pasteur Boston, Massachusetts 02115, USA. Phone: (617) 525-4335; Fax: (617) 525-4333. E-mail: [alichtman@rics.bwh.harvard.edu](mailto:alichtman@rics.bwh.harvard.edu)

Nonstandard abbreviations used: KLF2, kruppel-like factor 2; S1PR1, sphingosine 1 phosphate receptor 1; PHA, phytohemagglutinin; IP-10, IFN- $\gamma$  inducible protein 10; GGPP, geranylgeranyl pyrophosphate; FPP, farnesyl pyrophosphate; GGTI, geranyl geranyl transferase inhibitor; FTI, farnesyl transferase inhibitor.

Conflict of interest: The authors have declared that no conflict of interest exists.

| Gene                            | Forward Primer                               | Reverse Primer                          |
|---------------------------------|----------------------------------------------|-----------------------------------------|
| <b>MOUSE</b>                    |                                              |                                         |
| <i>β-actin</i>                  | 5'-TCC TTC GTT GCC GGT CCA-3'                | 5'-ACC AGC GCA GCG ATA TCG TC-3'        |
| <i>Klf2</i>                     | 5'-ACA GAC TGC TAT TTA TTG GAC CTT AG-3'     | 5'-CAG AAC TGG TGG CAG AGT CAT TT-3'    |
| <i>Ccr7</i>                     | 5'-CCA GAC CGT GGC CAA TTT CAA CAT-3'        | 5'-ACA AGA AAG GGT TGA CAC AGC AGC-3'   |
| <i>Ccr5</i>                     | 5'-ACT GCT GCC TAA ACC CTG TCA TCT-3'        | 5'-TTC ATG TTC TCC TGT GGA TCG GGT-3'   |
| <i>Sell</i><br>( <i>Cd62l</i> ) | 5'-CAT TCC TGT AGC CGT CAT GG-3'             | 5'-AGG AGG AGC TGT TGG TCA TG-3'        |
| <i>Ifng</i>                     | 5'-AAC GCT ACA CAC TGC ATC TTG G-3'          | 5'-GCC GTG GCA GTA ACA GCC-3'           |
| <i>S1pr1</i>                    | 5'-GTG TAG ACC CAG AGT CCT GCG-3'            | 5'-AGC TTT TCC TTG GCT GGA GAG-3'       |
| <i>Vcam1</i>                    | 5'-CCA AAT CCA CGC TTG TGT TGA-3'            | 5'-GGA ATG AGT AGA CCT CCA CCT-3'       |
| <i>Cxcl10</i>                   | 5'-GCC GTC ATT TTC TGC CTC A-3'              | 5'-CGT CCT TGC GAG AGG GAT C-3'         |
| <i>Ccl5</i>                     | 5'-CAA GTG CTC CAA TCT TGC AGT C-3'          | 5'-TTC TCT GGG TTG GCA CAC AC-3'        |
| <b>HUMAN</b>                    |                                              |                                         |
| <i>β-actin</i>                  | 5'-GAG CTA CGA GCT GCC TGA CG-3'             | 5'-GTA GTT TCG TGG ATG CCA CAG GAC T-3' |
| <i>KLF2</i>                     | 5'-CTT TCG CCA GCC CGT GCC GCG-3'            | 5'-AAG TCC AGC ACG CTG TTG AGG-3'       |
| <i>IFNG</i>                     | 5'-ATA TTT TAA TGC AGG TCA TTC AGA TGT AG-3' | 5'-TGA AGT AAA AGG AGA CAA TTT GGC T-3' |
| <i>CD59</i>                     | 5'-ATG CGT GTC TCA TTA C-3'                  | 5'-TTC TCT GAT AAG GAT GTC-3'           |

**Supplemental Table 1: Oligonucleotide primers used for qRT-PCR**

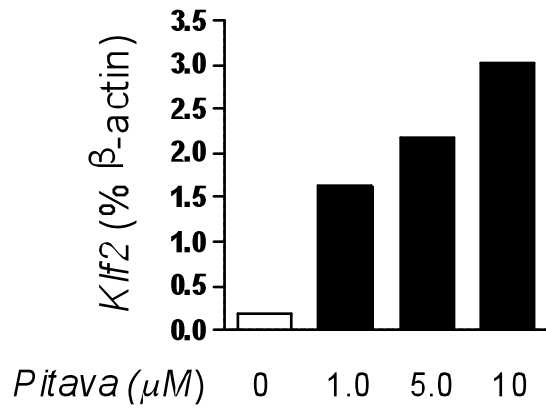

**Supplemental Figure 1. Dose response of pitavastatin induction of *Klf2* mRNA in effector mouse T cells.** *In vitro*-generated effector OT-1 cells were treated with the indicated concentrations of pitavastatin for 18h before RNA isolation and qRT-PCR analysis of *Klf2*.

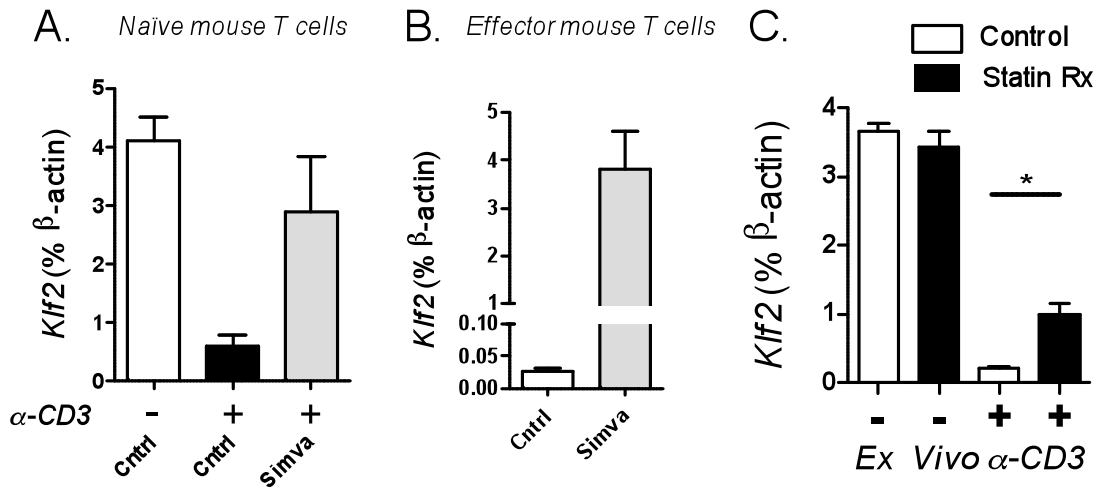

**Supplemental Figure 2. Statins increase mouse CD4<sup>+</sup> T cell *Klf2* mRNA expression.** Naïve OT-II (CD4<sup>+</sup>) T cells were treated with the vehicle only (control), or 10  $\mu$ M simvastatin (Simva) for 18h, then stimulated with  $\alpha$ CD3 for 6h before RNA isolation and qRT-PCR analysis of *Klf2* (A). *In vitro*-generated effector OT-II cells were treated with the vehicle (control) or simvastatin for 18h, before RNA isolation and qRT-PCR analysis of *Klf2*. The data are the mean  $\pm$  s.d. of two experiments. C57BL/6 mice were injected i.p. with 20mg/kg lovastatin or DMSO vehicle control for 3 consecutive days. Splenic CD4<sup>+</sup> T cells were purified and cultured with or without  $\alpha$ -CD3 for 6h, RNA was isolated and qRT-PCR analysis was performed for *Klf2* expression (C), Data in C are the mean  $\pm$  S.E.M. from 3 experiments.

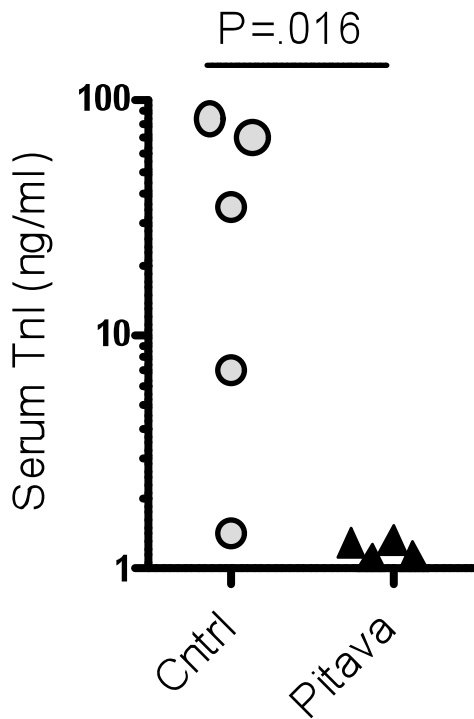

**Supplemental Figure 3. *In vivo* statin treatment reduces pathogenicity of T cells.** cMy-mOva mice were fed pitavastatin (30 mg/kg) or vehicle (control) by gavage twice per day for 8 days consecutive days. On the third day of statin treatment,  $5 \times 10^4$  effector OT-1 cells were adoptively transferred into the mice. The day following the last pitavastatin treatment, the mice were sacrificed, and serum was sampled for determination of troponin I levels. Data are the mean  $\pm$  S.E.M. of samples from 4 or 5 mice in each group.
